# Supplementary material
Source: PubMed Central journal article supplement (PMC7932856)
Supplement: mmc1.pdf [file mmc1.pdf]

# Supplementary material

**Supplemental Table 1.** Genbank accession number list of SARS-CoV-2 genome sequences from 4230 variants

| America  |          |          |          |          |          |          |          |          |          |          | Asia     |          | Oceania  |          | Europe   | Africa   |
|----------|----------|----------|----------|----------|----------|----------|----------|----------|----------|----------|----------|----------|----------|----------|----------|----------|
| MT163719 | MT252741 | MT263410 | MT293219 | MT326082 | MT412251 | MT520252 | MT628116 | MT300186 | MT642120 | MT646083 | LC522972 | MT560668 | MT007544 | MT451459 | MT020781 | MT324062 |
| MT188339 | MT252742 | MT263411 | MT293220 | MT326083 | MT412252 | MT520262 | MT628119 | MT358401 | MT642121 | MT646084 | LC522973 | MT560669 | MT450932 | MT451460 | MT077125 | MT499215 |
| MT188340 | MT252745 | MT263412 | MT293222 | MT326084 | MT412253 | MT520263 | MT628121 | MT358402 | MT642122 | MT646086 | LC522974 | MT560672 | MT450935 | MT451462 | MT093571 | MT499217 |
| MT188341 | MT252746 | MT263413 | MT293224 | MT326085 | MT412295 | MT520264 | MT628123 | MT358644 | MT642124 | MT646087 | LC522975 | MT560673 | MT450936 | MT451464 | MT198652 | MT499218 |
| MT192765 | MT252747 | MT263414 | MT293225 | MT326086 | MT412297 | MT520265 | MT628149 | MT358743 | MT642125 | MT646088 | LC529905 | MT560674 | MT450938 | MT451465 | MT233519 | MT499219 |
| MT246449 | MT252748 | MT263415 | MT295464 | MT326087 | MT412298 | MT520266 | MT628150 | MT358744 | MT642129 | MT646089 | LC534418 | MT560675 | MT450941 | MT451466 | MT233522 | MT499220 |
| MT246450 | MT252749 | MT263416 | MT295465 | MT326088 | MT412299 | MT520271 | MT628152 | MT375457 | MT642133 | MT646090 | LC534419 | MT560679 | MT450942 | MT451467 | MT270101 | MT510690 |
| MT246451 | MT252756 | MT263417 | MT304477 | MT326089 | MT412300 | MT520272 | MT628153 | MT375458 | MT642136 | MT646091 | LC542809 | MT560680 | MT450944 | MT451470 | MT270102 | MT510691 |
| MT246452 | MT252758 | MT263418 | MT304478 | MT326090 | MT412302 | MT520273 | MT628154 | MT375460 | MT642137 | MT646092 | LC542976 | MT560682 | MT450948 | MT451472 | MT270103 | MT510692 |
| MT246453 | MT252761 | MT263419 | MT304479 | MT326092 | MT412303 | MT520276 | MT628155 | MT375463 | MT642138 | MT646093 | LC546038 | MT560689 | MT450949 | MT451473 | MT270104 | MT510693 |
| MT246454 | MT252763 | MT263420 | MT304482 | MT326093 | MT412304 | MT520283 | MT628156 | MT375467 | MT642142 | MT646094 | LC547518 | MT560690 | MT450950 | MT451474 | MT270105 | MT510694 |
| MT246455 | MT252764 | MT263421 | MT304483 | MT326095 | MT412305 | MT520288 | MT628157 | MT375470 | MT642143 | MT646096 | LC547519 | MT560692 | MT450951 | MT451476 | MT270106 | MT510696 |
| MT246457 | MT252767 | MT263422 | MT304487 | MT326096 | MT412306 | MT520290 | MT628158 | MT375471 | MT642144 | MT646097 | LC547521 | MT560693 | MT450955 | MT451477 | MT270108 | MT510697 |
| MT246459 | MT252768 | MT263423 | MT304488 | MT326097 | MT412307 | MT520292 | MT628160 | MT375474 | MT642147 | MT646098 | LC547522 | MT560704 | MT450956 | MT451478 | MT270111 | MT510698 |
| MT246460 | MT252769 | MT263425 | MT304490 | MT326099 | MT412308 | MT520298 | MT628181 | MT375476 | MT642148 | MT646101 | LC547523 | MT560705 | MT450957 | MT451479 | MT270112 | MT510699 |
| MT246461 | MT252770 | MT263428 | MT304491 | MT326100 | MT412309 | MT520301 | MT628184 | MT375477 | MT642150 | MT646106 | LC547526 | MT566435 | MT450960 | MT451482 | MT270113 | MT510700 |
| MT246462 | MT252772 | MT263429 | MT325561 | MT326103 | MT419837 | MT520302 | MT628186 | MT375478 | MT642151 | MT646112 | LC547527 | MT566436 | MT450961 | MT451485 | MT270114 | MT510701 |
| MT246464 | MT252774 | MT263430 | MT325562 | MT326104 | MT419839 | MT520305 | MT628204 | MT375481 | MT642152 | MT646116 | LC547528 | MT566437 | MT450962 | MT451488 | MT292569 | MT510702 |
| MT246466 | MT252775 | MT263431 | MT325563 | MT326105 | MT419842 | MT520308 | MT628205 | MT375482 | MT642154 | MT646117 | LC547529 | MT568634 | MT450963 | MT451492 | MT292570 | MT510703 |
| MT246467 | MT252778 | MT263432 | MT325564 | MT326106 | MT419851 | MT520309 | MT628206 | MT375483 | MT642158 | MT646120 | LC547530 | MT568635 | MT450965 | MT451493 | MT292571 | MT511065 |
| MT246468 | MT252779 | MT263433 | MT325565 | MT326111 | MT422806 | MT520312 | MT628207 | MT380730 | MT642160 | MT670013 | LC547532 | MT568636 | MT450968 | MT451496 | MT292572 | MT511083 |
| MT246470 | MT252780 | MT263434 | MT325566 | MT326112 | MT422807 | MT520319 | MT628208 | MT385416 | MT642161 | MT670014 | LC547533 | MT568637 | MT450971 | MT451498 | MT292573 | MT511084 |
| MT246471 | MT252781 | MT263435 | MT325567 | MT326113 | MT429183 | MT520321 | MT628209 | MT385417 | MT642163 | MT670015 | LC549340 | MT568638 | MT450972 | MT451499 | MT292574 | MT513758 |
| MT246472 | MT252782 | MT263436 | MT325568 | MT326116 | MT439234 | MT520323 | MT628210 | MT385419 | MT642165 | MT670017 | LC553257 | MT568639 | MT450973 | MT451506 | MT292575 | MT549878 |
| MT246473 | MT252784 | MT263437 | MT325569 | MT326117 | MT439237 | MT520329 | MT628211 | MT385427 | MT642169 | MT670018 | LC553258 | MT568640 | MT450977 | MT451507 | MT318827 | MT559037 |
| MT246474 | MT252785 | MT263439 | MT325572 | MT326118 | MT439247 | MT520330 | MT628212 | MT385433 | MT642172 | MT670019 | LC553259 | MT568641 | MT450980 | MT451508 | MT320538 | MT559038 |
| MT246475 | MT252788 | MT263440 | MT325575 | MT326119 | MT439251 | MT520331 | MT628213 | MT385435 | MT642179 | MT670021 | LC553260 | MT568643 | MT450981 | MT451509 | MT328032 | MT568645 |
| MT246476 | MT252792 | MT263441 | MT325576 | MT326120 | MT439252 | MT520332 | MT628218 | MT385438 | MT642181 | MT670022 | LC553261 | MT576031 | MT450982 | MT451510 | MT328033 | MT576584 |
| MT246477 | MT252793 | MT263442 | MT325577 | MT326123 | MT439253 | MT520340 | MT628222 | MT385442 | MT642184 | MT710714 | LC553262 | MT576033 | MT450983 | MT451511 | MT328034 |          |
| MT246478 | MT252794 | MT263443 | MT325578 | MT326124 | MT439254 | MT520343 | MT628223 | MT385451 | MT642185 | MT738101 | LC553263 | MT576034 | MT450985 | MT451512 | MT328035 |          |
| MT246479 | MT252795 | MT263444 | MT325579 | MT326125 | MT439256 | MT520347 | MT628224 | MT385452 | MT642187 | MT738173 | LC553269 | MT576035 | MT450989 | MT451513 | MT358638 |          |
| MT246480 | MT252797 | MT263445 | MT325581 | MT326127 | MT439258 | MT520352 | MT628225 | MT385455 | MT642188 | MT642309 | LC553270 | MT576037 | MT450990 | MT451514 | MT358639 |          |

|          |          |          |          |          |          |          |          |          |          |          |          |          |          |          |          |
|----------|----------|----------|----------|----------|----------|----------|----------|----------|----------|----------|----------|----------|----------|----------|----------|
| MT246481 | MT252799 | MT263446 | MT325584 | MT326128 | MT439260 | MT520353 | MT628227 | MT385468 | MT642190 | MT642314 | LR757996 | MT576039 | MT450991 | MT451515 | MT358640 |
| MT246482 | MT252800 | MT263447 | MT325585 | MT326129 | MT439261 | MT520357 | MT628228 | MT385470 | MT642193 | MT642324 | MN938384 | MT576040 | MT450992 | MT451516 | MT358641 |
| MT246484 | MT252804 | MT263448 | MT325586 | MT326130 | MT439262 | MT520359 | MT628252 | MT412226 | MT642194 | MT642325 | MN975262 | MT576041 | MT450993 | MT451518 | MT358642 |
| MT246486 | MT252805 | MT263449 | MT325587 | MT326132 | MT439263 | MT520368 | MT628253 | MT412227 | MT642195 | MT642326 | MN988669 | MT576043 | MT450996 | MT451519 | MT358643 |
| MT246487 | MT252806 | MT263450 | MT325588 | MT326133 | MT439265 | MT520369 | MT628254 | MT412228 | MT642197 | MT642329 | MT012098 | MT576044 | MT450997 | MT451520 | MT359865 |
| MT246488 | MT252807 | MT263452 | MT325589 | MT326134 | MT439268 | MT520371 | MT628255 | MT412254 | MT642199 | MT642332 | MT019533 | MT576045 | MT450998 | MT451522 | MT359866 |
| MT246489 | MT252810 | MT263456 | MT325592 | MT326135 | MT439270 | MT520373 | MT628256 | MT412255 | MT642201 | MT642333 | MT039873 | MT576046 | MT450999 | MT451523 | MT371570 |
| MT246490 | MT256924 | MT263457 | MT325594 | MT326137 | MT439271 | MT520374 | MT628257 | MT412256 | MT642202 | MT642336 | MT039874 | MT576048 | MT451000 | MT451524 | MT371571 |
| MT251972 | MT258377 | MT263458 | MT325595 | MT326140 | MT439279 | MT520380 | MT628258 | MT412257 | MT642203 | MT642337 | MT039890 | MT576049 | MT451002 | MT451525 | MT371572 |
| MT251973 | MT258378 | MT263459 | MT325596 | MT326147 | MT439280 | MT520382 | MT628259 | MT412258 | MT642204 | MT642339 | MT049951 | MT576052 | MT451004 | MT451529 | MT459834 |
| MT251974 | MT258379 | MT263462 | MT325597 | MT326148 | MT439282 | MT520383 | MT628260 | MT412259 | MT642206 | MT642345 | MT050493 | MT576053 | MT451006 | MT451531 | MT459837 |
| MT251975 | MT258380 | MT263463 | MT325599 | MT326149 | MT439283 | MT520384 | MT628261 | MT412261 | MT642207 | MT642348 | MT066175 | MT576054 | MT451007 | MT451532 | MT459838 |
| MT251976 | MT258381 | MT263464 | MT325602 | MT326150 | MT439284 | MT520390 | MT628262 | MT412264 | MT642210 | MT642350 | MT066176 | MT576055 | MT451008 | MT451535 | MT459840 |
| MT251977 | MT258382 | MT263465 | MT325604 | MT326152 | MT439287 | MT520398 | MT628263 | MT412268 | MT642212 | MT642351 | MT072688 | MT576056 | MT451009 | MT451536 | MT459841 |
| MT251978 | MT258383 | MT263467 | MT325607 | MT326153 | MT439288 | MT520402 | MT628264 | MT412269 | MT642216 | MT642362 | MT079843 | MT576057 | MT451015 | MT451537 | MT459844 |
| MT251980 | MT259236 | MT263468 | MT325608 | MT326154 | MT439289 | MT520403 | MT628265 | MT412271 | MT642217 | MT642363 | MT079844 | MT576058 | MT451017 | MT451540 | MT459845 |
| MT252677 | MT259237 | MT263469 | MT325610 | MT326158 | MT439290 | MT520405 | MT628266 | MT412273 | MT642218 | MT642365 | MT079845 | MT576059 | MT451018 | MT451546 | MT459846 |
| MT252678 | MT259243 | MT293156 | MT325612 | MT326159 | MT439292 | MT520407 | MT628267 | MT412274 | MT642226 | MT642367 | MT079846 | MT576060 | MT451019 | MT451547 | MT459847 |
| MT252679 | MT259244 | MT293158 | MT325613 | MT326162 | MT439293 | MT520411 | MT628268 | MT412275 | MT642229 | MT642371 | MT079847 | MT576061 | MT451020 | MT451549 | MT459849 |
| MT252680 | MT259245 | MT293159 | MT325614 | MT326164 | MT439295 | MT520416 | MT628269 | MT412276 | MT642230 | MT642373 | MT079848 | MT576529 | MT451021 | MT451552 | MT459850 |
| MT252681 | MT259246 | MT293161 | MT325615 | MT326166 | MT439297 | MT520417 | MT628270 | MT412277 | MT642233 | MT642374 | MT079849 | MT576530 | MT451024 | MT451559 | MT459852 |
| MT252682 | MT259248 | MT293162 | MT325622 | MT326167 | MT439300 | MT520426 | MT628271 | MT412278 | MT642235 | MT642384 | MT079850 | MT576531 | MT451026 | MT451568 | MT459853 |
| MT252683 | MT259249 | MT293163 | MT325625 | MT326168 | MT439302 | MT520427 | MT628272 | MT412279 | MT642239 | MT642387 | MT079851 | MT576532 | MT451033 | MT451569 | MT459857 |
| MT252684 | MT259251 | MT293165 | MT325626 | MT326169 | MT439307 | MT520431 | MT631785 | MT412280 | MT642240 | MT642388 | MT079852 | MT576639 | MT451035 | MT451580 | MT459860 |
| MT252685 | MT259252 | MT293166 | MT325628 | MT326171 | MT439310 | MT520432 | MT631786 | MT412281 | MT642241 | MT642392 | MT079853 | MT576640 | MT451036 | MT451581 | MT459861 |
| MT252686 | MT259253 | MT293171 | MT325634 | MT326178 | MT439311 | MT520433 | MT631787 | MT412283 | MT642242 | MT642393 | MT079854 | MT576641 | MT451037 | MT451582 | MT459864 |
| MT252687 | MT259254 | MT293172 | MT325635 | MT326184 | MT439312 | MT520435 | MT631788 | MT412284 | MT642243 | MT642394 | MT093631 | MT576642 | MT451038 | MT451590 | MT459865 |
| MT252688 | MT259256 | MT293173 | MT325640 | MT326185 | MT439314 | MT520436 | MT631790 | MT412285 | MT642244 | MT642396 | MT114412 | MT576643 | MT451039 | MT451592 | MT459870 |
| MT252689 | MT259257 | MT293174 | MT326023 | MT326187 | MT439316 | MT520440 | MT631793 | MT412286 | MT642247 | MT642400 | MT114413 | MT576644 | MT451040 | MT451597 | MT459872 |
| MT252690 | MT259258 | MT293175 | MT326024 | MT326190 | MT439317 | MT520448 | MT631794 | MT412287 | MT642252 | MT642402 | MT114416 | MT576689 | MT451041 | MT451602 | MT459877 |
| MT252691 | MT259260 | MT293176 | MT326025 | MT326191 | MT444148 | MT520452 | MT631795 | MT412288 | MT642253 | MT642403 | MT114417 | MT577359 | MT451042 | MT451603 | MT459878 |
| MT252693 | MT259261 | MT293177 | MT326027 | MT334529 | MT452574 | MT520453 | MT631797 | MT412289 | MT642254 | MT642404 | MT114418 | MT578016 | MT451044 | MT451607 | MT459880 |
| MT252694 | MT259263 | MT293178 | MT326028 | MT334533 | MT452575 | MT520454 | MT631799 | MT412290 | MT642255 | MT642406 | MT114419 | MT578017 | MT451047 | MT451608 | MT459881 |
| MT252695 | MT259264 | MT293179 | MT326029 | MT334534 | MT452576 | MT520458 | MT631813 | MT412291 | MT642256 | MT642408 | MT121215 | MT601275 | MT451049 | MT451611 | MT459882 |
| MT252696 | MT259266 | MT293181 | MT326030 | MT334537 | MT459988 | MT520460 | MT631816 | MT412293 | MT642258 | MT642421 | MT123290 | MT601276 | MT451052 | MT451630 | MT459883 |
| MT252697 | MT259267 | MT293182 | MT326031 | MT334538 | MT459989 | MT520461 | MT631817 | MT412294 | MT642261 | MT642430 | MT123291 | MT601277 | MT451058 | MT451631 | MT459885 |
| MT252698 | MT259269 | MT293183 | MT326035 | MT334540 | MT459990 | MT520464 | MT631819 | MT412296 | MT642262 | MT642432 | MT123292 | MT601278 | MT451060 | MT451636 | MT459888 |
| MT252699 | MT259271 | MT293184 | MT326036 | MT334541 | MT461603 | MT520465 | MT631820 | MT412311 | MT642263 | MT642435 | MT123293 | MT601279 | MT451061 | MT451637 | MT459891 |
| MT252700 | MT259273 | MT293185 | MT326039 | MT334542 | MT461604 | MT520467 | MT631823 | MT412312 | MT642265 | MT807936 | MT135041 | MT601280 | MT451062 | MT451638 | MT459896 |

|          |          |          |          |          |          |          |          |          |          |          |          |          |          |          |          |
|----------|----------|----------|----------|----------|----------|----------|----------|----------|----------|----------|----------|----------|----------|----------|----------|
| MT252702 | MT259275 | MT293186 | MT326040 | MT334547 | MT461605 | MT520477 | MT631825 | MT412313 | MT642266 | MN985325 | MT135043 | MT601281 | MT451066 | MT451640 | MT459897 |
| MT252703 | MT259277 | MT293187 | MT326048 | MT339039 | MT461606 | MT520478 | MT631828 | MT412314 | MT642268 | MN988713 | MT186683 | MT601282 | MT451072 | MT451641 | MT459899 |
| MT252704 | MT259278 | MT293188 | MT326049 | MT344944 | MT461607 | MT520479 | MT631829 | MT412316 | MT642269 | MN994467 | MT192759 | MT601283 | MT451074 | MT451642 | MT459900 |
| MT252705 | MT259281 | MT293189 | MT326051 | MT344945 | MT461608 | MT520482 | MT631833 | MT412317 | MT642270 | MN994468 | MT192772 | MT601284 | MT451076 | MT451644 | MT459903 |
| MT252706 | MT259282 | MT293190 | MT326052 | MT344948 | MT461609 | MT520483 | MT631837 | MT412318 | MT642271 | MN997409 | MT192773 | MT601285 | MT451077 | MT451646 | MT459904 |
| MT252707 | MT259285 | MT293192 | MT326053 | MT344949 | MT461610 | MT520487 | MT631840 | MT412319 | MT642272 | MT027063 | MT226610 | MT601286 | MT451081 | MT451647 | MT459905 |
| MT252708 | MT259286 | MT293195 | MT326054 | MT344953 | MT461611 | MT520489 | MT631841 | MT412321 | MT642275 | MT027064 | MT230904 | MT601288 | MT451087 | MT451650 | MT459908 |
| MT252709 | MT262899 | MT293196 | MT326055 | MT344954 | MT461612 | MT520493 | MT631842 | MT412322 | MT642277 | MT039887 | MT240479 | MT601289 | MT451088 | MT451651 | MT459910 |
| MT252710 | MT263074 | MT293198 | MT326056 | MT344956 | MT461620 | MT520494 | MT632766 | MT412324 | MT642278 | MT039888 | MT253704 | MT601290 | MT451090 | MT451653 | MT459911 |
| MT252712 | MT263381 | MT293200 | MT326058 | MT344957 | MT461621 | MT520495 | MT632769 | MT412325 | MT642280 | MT044257 | MT253706 | MT601291 | MT451092 | MT451655 | MT459912 |
| MT252713 | MT263383 | MT293201 | MT326059 | MT344959 | MT461622 | MT520497 | MT632770 | MT412326 | MT642283 | MT044258 | MT259226 | MT601292 | MT451093 | MT451657 | MT459915 |
| MT252716 | MT263390 | MT293202 | MT326061 | MT344961 | MT461623 | MT520504 | MT632776 | MT412327 | MT642285 | MT106052 | MT259227 | MT601293 | MT451098 | MT451659 | MT459917 |
| MT252717 | MT263392 | MT293204 | MT326063 | MT344962 | MT461624 | MT520505 | MT632777 | MT412329 | MT642287 | MT106053 | MT259228 | MT601294 | MT451101 | MT451662 | MT459922 |
| MT252719 | MT263395 | MT293205 | MT326065 | MT344963 | MT461625 | MT520506 | MT632783 | MT412330 | MT642288 | MT106054 | MT259229 | MT601295 | MT451102 | MT451664 | MT459923 |
| MT252721 | MT263396 | MT293207 | MT326067 | MT345798 | MT461626 | MT520507 | MT632784 | MT412331 | MT642290 | MT118835 | MT259230 | MT605818 | MT451103 | MT451665 | MT459924 |
| MT252723 | MT263398 | MT293208 | MT326068 | MT345801 | MT461627 | MT520510 | MT632785 | MT412332 | MT642293 | MT126808 | MT259231 | MT607244 | MT451104 | MT451666 | MT459925 |
| MT252726 | MT263399 | MT293209 | MT326069 | MT345802 | MT461628 | MT520518 | MT632788 | MT412333 | MT642295 | MT152824 | MT262993 | MT607245 | MT451105 | MT451667 | MT459979 |
| MT252728 | MT263400 | MT293210 | MT326070 | MT345803 | MT461629 | MT520525 | MT632789 | MT412336 | MT642298 | MT159705 | MT270815 | MT607246 | MT451108 | MT451668 | MT470100 |
| MT252729 | MT263402 | MT293211 | MT326071 | MT345805 | MT461630 | MT520529 | MT632790 | MT412337 | MT642299 | MT159706 | MT276597 | MT607247 | MT451114 | MT451669 | MT470101 |
| MT252733 | MT263403 | MT293212 | MT326074 | MT345806 | MT466071 | MT520530 | MT632792 | MT429184 | MT642300 | MT159707 | MT276598 | MT607248 | MT451115 | MT451674 | MT470103 |
| MT252735 | MT263404 | MT293213 | MT326075 | MT345808 | MT466583 | MT520536 | MT632794 | MT429185 | MT642302 | MT159708 | MT276600 | MT607250 | MT451116 | MT451675 | MT470104 |
| MT252736 | MT263405 | MT293215 | MT326076 | MT345809 | MT472622 | MT520538 | MT632796 | MT429186 | MT642303 | MT159709 | MT281577 | MT607252 | MT451118 | MT451679 | MT470105 |
| MT252738 | MT263406 | MT293216 | MT326078 | MT345811 | MT472624 | MT532435 | MT632797 | MT429187 | MT642305 | MT159710 | MT291831 | MT607253 | MT451119 | MT451680 | MT470106 |
| MT252739 | MT263408 | MT293218 | MT326081 | MT345812 | MT472625 | MT532436 | MT632804 | MT429188 | MT642307 | MT159712 | MT291832 | MT607254 | MT451122 | MT451682 | MT470107 |
| MT345814 | MT370890 | MT472626 | MT520259 | MT614528 | MT632552 | MT532437 | MT632817 | MT429189 | MT642308 | MT159715 | MT291833 | MT607255 | MT451123 | MT451683 | MT470111 |
| MT345815 | MT370891 | MT472627 | MT520260 | MT614529 | MT632553 | MT532438 | MT632825 | MT429191 | MT642311 | MT159716 | MT291834 | MT607602 | MT451124 | MT451684 | MT470113 |
| MT345816 | MT370892 | MT474126 | MT520261 | MT614531 | MT632554 | MT533197 | MT632827 | MT432195 | MT642312 | MT159717 | MT291835 | MT607604 | MT451126 | MT451686 | MT470114 |
| MT345817 | MT370894 | MT474128 | MT520277 | MT614533 | MT632555 | MT533199 | MT632828 | MT438718 | MT642313 | MT159718 | MT291836 | MT607605 | MT451127 | MT451690 | MT470115 |
| MT345819 | MT370895 | MT474129 | MT520278 | MT614534 | MT632557 | MT533200 | MT632836 | MT438720 | MT642315 | MT159720 | MT304474 | MT607607 | MT451128 | MT451708 | MT470116 |
| MT345821 | MT370896 | MT474130 | MT520279 | MT614536 | MT632558 | MT533203 | MT632843 | MT438722 | MT642316 | MT159722 | MT320891 | MT607608 | MT451129 | MT451711 | MT470120 |
| MT345822 | MT370898 | MT474131 | MT520280 | MT614538 | MT632559 | MT533208 | MT632847 | MT438724 | MT642317 | MT163716 | MT327745 | MT607609 | MT451130 | MT451713 | MT470122 |
| MT345823 | MT370899 | MT474134 | MT520284 | MT614539 | MT632560 | MT533210 | MT632853 | MT438725 | MT642319 | MT163717 | MT358637 | MT607610 | MT451131 | MT451716 | MT470123 |
| MT345824 | MT370901 | MT474135 | MT520287 | MT614541 | MT632562 | MT533212 | MT632856 | MT438727 | MT642320 | MT163718 | MT365028 | MT607611 | MT451134 | MT451726 | MT470124 |
| MT345825 | MT370902 | MT474136 | MT520289 | MT614542 | MT632563 | MT533215 | MT632858 | MT438728 | MT642321 | MT184908 | MT365029 | MT607612 | MT451135 | MT451728 | MT470125 |
| MT345826 | MT370903 | MT477835 | MT520291 | MT614543 | MT632569 | MT533217 | MT632859 | MT438729 | MT642322 | MT184910 | MT365030 | MT607614 | MT451136 | MT451733 | MT470126 |
| MT345827 | MT370905 | MT477836 | MT520296 | MT614545 | MT632570 | MT533218 | MT632863 | MT438730 | MT642323 | MT184911 | MT365031 | MT607616 | MT451138 | MT451751 | MT470127 |
| MT345828 | MT370906 | MT477837 | MT520299 | MT614546 | MT632571 | MT533219 | MT632865 | MT438731 | MT642327 | MT184913 | MT365032 | MT607617 | MT451139 | MT451762 | MT470132 |
| MT345829 | MT370907 | MT477838 | MT520306 | MT614548 | MT632572 | MT533221 | MT632868 | MT438736 | MT642330 | MT233526 | MT370516 | MT607618 | MT451140 | MT451777 | MT470134 |
| MT345830 | MT370908 | MT477839 | MT520307 | MT614550 | MT632573 | MT533222 | MT632872 | MT438737 | MT642341 | MT246667 | MT371047 | MT607619 | MT451141 | MT451786 | MT470135 |

|          |          |          |          |          |          |          |          |          |          |          |          |           |          |          |          |
|----------|----------|----------|----------|----------|----------|----------|----------|----------|----------|----------|----------|-----------|----------|----------|----------|
| MT345832 | MT370909 | MT477840 | MT520310 | MT614552 | MT632574 | MT533223 | MT632876 | MT438738 | MT642342 | MT276323 | MT371048 | MT608648  | MT451142 | MT451792 | MT470136 |
| MT345833 | MT370911 | MT477841 | MT520313 | MT614554 | MT632575 | MT533225 | MT632879 | MT438739 | MT642343 | MT276324 | MT371049 | MT621560  | MT451143 | MT451795 | MT470137 |
| MT345834 | MT370913 | MT477842 | MT520314 | MT614556 | MT632576 | MT533226 | MT632882 | MT438741 | MT642346 | MT276325 | MT371050 | MT622319  | MT451145 | MT459985 | MT470142 |
| MT345835 | MT370914 | MT477843 | MT520315 | MT614557 | MT632577 | MT533227 | MT632884 | MT438742 | MT642349 | MT276326 | MT372480 | MT627325  | MT451146 | MT459986 | MT470144 |
| MT345836 | MT370915 | MT477844 | MT520316 | MT614558 | MT632579 | MT533228 | MT632887 | MT438743 | MT642352 | MT276328 | MT372481 | MT630421  | MT451147 | MT459987 | MT470145 |
| MT345840 | MT370916 | MT477845 | MT520317 | MT614560 | MT632580 | MT533229 | MT632893 | MT438744 | MT642353 | MT276329 | MT374102 | MT630422  | MT451148 | MT612108 | MT470146 |
| MT345841 | MT370917 | MT477847 | MT520320 | MT614563 | MT632581 | MT533230 | MT632894 | MT438746 | MT642355 | MT276330 | MT374103 | MT630423  | MT451149 | MT612154 | MT470147 |
| MT345842 | MT370919 | MT477848 | MT520325 | MT627217 | MT632582 | MT533236 | MT632896 | MT438747 | MT642356 | MT276331 | MT374104 | MT630424  | MT451150 | MT612170 | MT470148 |
| MT345844 | MT370921 | MT477849 | MT520327 | MT627221 | MT632583 | MT533237 | MT632905 | MT438748 | MT642357 | MT304484 | MT374105 | MT630425  | MT451151 | MT641645 | MT470149 |
| MT345846 | MT370922 | MT477852 | MT520328 | MT627223 | MT632584 | MT533238 | MT632910 | MT438750 | MT642359 | MT304489 | MT374106 | MT630426  | MT451152 | MT641646 | MT470152 |
| MT345847 | MT370923 | MT477853 | MT520333 | MT627225 | MT632585 | MT534304 | MT632911 | MT438751 | MT642360 | MT370904 | MT374107 | MT630427  | MT451153 | MT641648 | MT470153 |
| MT345848 | MT370924 | MT477854 | MT520336 | MT627228 | MT632589 | MT534305 | MT632914 | MT438753 | MT642364 | MT419829 | MT374108 | MT630428  | MT451154 | MT641651 | MT470154 |
| MT345849 | MT370925 | MT481927 | MT520337 | MT627229 | MT632590 | MT534308 | MT632916 | MT438754 | MT642366 | MT419830 | MT374109 | MT630429  | MT451155 | MT641654 | MT470156 |
| MT345851 | MT370926 | MT481928 | MT520338 | MT627231 | MT632591 | MT534311 | MT632919 | MT438756 | MT642369 | MT419831 | MT374110 | MT630430  | MT451156 | MT641655 | MT470157 |
| MT345853 | MT370927 | MT481992 | MT520339 | MT627232 | MT632593 | MT534312 | MT632920 | MT438757 | MT642375 | MT419841 | MT374111 | MT630431  | MT451157 | MT641656 | MT470159 |
| MT345854 | MT370930 | MT499171 | MT520341 | MT627234 | MT632595 | MT534313 | MT632930 | MT438758 | MT642378 | MT598636 | MT374112 | MT635269  | MT451158 | MT641657 | MT470160 |
| MT345856 | MT370931 | MT499172 | MT520342 | MT627236 | MT632596 | MT534314 | MT632931 | MT438760 | MT642380 | MT598641 | MT374113 | MT635270  | MT451159 | MT641661 | MT470161 |
| MT345858 | MT370932 | MT499173 | MT520344 | MT627237 | MT632601 | MT534315 | MT632932 | MT444619 | MT642382 | MT627216 | MT374114 | MT635271  | MT451160 | MT641663 | MT470164 |
| MT345859 | MT370933 | MT499174 | MT520346 | MT627238 | MT632602 | MT534316 | MT632936 | MT444624 | MT642385 | MT627219 | MT374115 | MT635272  | MT451161 | MT641665 | MT470166 |
| MT345860 | MT370935 | MT499175 | MT520348 | MT627240 | MT632606 | MT534317 | MT632937 | MT444633 | MT642389 | MT627226 | MT374116 | MT635328  | MT451162 | MT641666 | MT470168 |
| MT345861 | MT370937 | MT499177 | MT520350 | MT627241 | MT632610 | MT534318 | MT632940 | MT446339 | MT642390 | MT627233 | MT407649 | MT635339  | MT451163 | MT641671 | MT470169 |
| MT345862 | MT370938 | MT499180 | MT520351 | MT627244 | MT632613 | MT534320 | MT632950 | MT446342 | MT642391 | MT627235 | MT407650 | MT635391  | MT451164 | MT641673 | MT470171 |
| MT345865 | MT370940 | MT499181 | MT520355 | MT627249 | MT632621 | MT534323 | MT632952 | MT446343 | MT642395 | MT627242 | MT407651 | MT635392  | MT451165 | MT641674 | MT470172 |
| MT345866 | MT370942 | MT499182 | MT520356 | MT627250 | MT632622 | MT534324 | MT632957 | MT446344 | MT642398 | MT627243 | MT407652 | MT635393  | MT451166 | MT641677 | MT470175 |
| MT345867 | MT370944 | MT499183 | MT520358 | MT627251 | MT632623 | MT534329 | MT632958 | MT446345 | MT642401 | MT627245 | MT407653 | MT635397  | MT451167 | MT641682 | MT470176 |
| MT345868 | MT370946 | MT499184 | MT520360 | MT627256 | MT632624 | MT534334 | MT632960 | MT446346 | MT642410 | MT627248 | MT407654 | MT635404  | MT451168 | MT641686 | MT470177 |
| MT345869 | MT370947 | MT499185 | MT520361 | MT627259 | MT632626 | MT534338 | MT632961 | MT446348 | MT642411 | MT627252 | MT407655 | MT635405  | MT451169 | MT641689 | MT470179 |
| MT345870 | MT370948 | MT499186 | MT520363 | MT627260 | MT632629 | MT534339 | MT632962 | MT446349 | MT642412 | MT627253 | MT407656 | MT635406  | MT451170 | MT641697 | MT499208 |
| MT345871 | MT370949 | MT499187 | MT520364 | MT627262 | MT632630 | MT535487 | MT632966 | MT446350 | MT642415 | MT627258 | MT407657 | MT635407  | MT451171 | MT641699 | MT499209 |
| MT345872 | MT370950 | MT499188 | MT520366 | MT627266 | MT632631 | MT535488 | MT632977 | MT446352 | MT642420 | MT627263 | MT407658 | MT635408  | MT451172 | MT641703 | MT499210 |
| MT345873 | MT370953 | MT499189 | MT520367 | MT627268 | MT632632 | MT535489 | MT632985 | MT446353 | MT642422 | MT627267 | MT407659 | MT635409  | MT451173 | MT641708 | MT510999 |
| MT345874 | MT370954 | MT499191 | MT520370 | MT627271 | MT632772 | MT535490 | MT632998 | MT446356 | MT642423 | MT627275 | MT412134 | MT635410  | MT451174 | MT641710 | MT511066 |
| MT345875 | MT370956 | MT499192 | MT520372 | MT627277 | MT632775 | MT535491 | MT633008 | MT446357 | MT642425 | MT627276 | MT415320 | MT635672  | MT451175 | MT641715 | MT511067 |
| MT345876 | MT370957 | MT499193 | MT520375 | MT627280 | MT632778 | MT535492 | MT633013 | MT446358 | MT642427 | MT627279 | MT415321 | MT635855  | MT451176 | MT641730 | MT511068 |
| MT345877 | MT370958 | MT499194 | MT520376 | MT627285 | MT632780 | MT535493 | MT633017 | MT446359 | MT642428 | MT627286 | MT415322 | MT635857  | MT451177 | MT641731 | MT511069 |
| MT345878 | MT370960 | MT499195 | MT520377 | MT627289 | MT632781 | MT535494 | MT633018 | MT449638 | MT642431 | MT627290 | MT415323 | MT644268  | MT451178 | MT641733 | MT511071 |
| MT345879 | MT370961 | MT499197 | MT520379 | MT627291 | MT632782 | MT535495 | MT633023 | MT449639 | MT642433 | MT627293 | MT416725 | MT648676  | MT451179 | MT641735 | MT511072 |
| MT345880 | MT370962 | MT499199 | MT520381 | MT627292 | MT632786 | MT535496 | MT633027 | MT449641 | MT460089 | MT627295 | MT428551 | NC 045512 | MT451180 | MT641736 | MT511073 |
| MT345881 | MT370965 | MT499200 | MT520385 | MT627294 | MT632787 | MT535497 | MT633030 | MT449643 | MT460090 | MT627299 | MT428552 |           | MT451181 | MT641738 | MT511075 |

|          |          |          |          |          |          |          |          |          |          |          |          |          |          |          |
|----------|----------|----------|----------|----------|----------|----------|----------|----------|----------|----------|----------|----------|----------|----------|
| MT345882 | MT370966 | MT499201 | MT520386 | MT627296 | MT632791 | MT535502 | MT641485 | MT449644 | MT460092 | MT627304 | MT428553 | MT451182 | MT641739 | MT511076 |
| MT345883 | MT370967 | MT499202 | MT520388 | MT627297 | MT632793 | MT535505 | MT641486 | MT449656 | MT512645 | MT627307 | MT428554 | MT451183 | MT641740 | MT511077 |
| MT345885 | MT370968 | MT499203 | MT520389 | MT627300 | MT632795 | MT535508 | MT641488 | MT449664 | MT534306 | MT627315 | MT446312 | MT451184 | MT641741 | MT511079 |
| MT345886 | MT370969 | MT499205 | MT520391 | MT627306 | MT632798 | MT535509 | MT641489 | MT449665 | MT534307 | MT627625 | MT447154 | MT451185 | MT641742 | MT511081 |
| MT345887 | MT370970 | MT506201 | MT520392 | MT627308 | MT632799 | MT536176 | MT641490 | MT449667 | MT534309 | MT627627 | MT447155 | MT451186 | MT641743 | MT511082 |
| MT345888 | MT370971 | MT506205 | MT520394 | MT627309 | MT632800 | MT536177 | MT641492 | MT449672 | MT534322 | MT627630 | MT447156 | MT451187 | MT641744 | MT517420 |
| MT350263 | MT370973 | MT506209 | MT520396 | MT627311 | MT632801 | MT536178 | MT641493 | MT449674 | MT534325 | MT632545 | MT447157 | MT451188 | MT641745 | MT517421 |
| MT350268 | MT370974 | MT506531 | MT520397 | MT627316 | MT632802 | MT536179 | MT641494 | MT449675 | MT534327 | MT632567 | MT447158 | MT451189 | MT641746 | MT517422 |
| MT350269 | MT370975 | MT506532 | MT520399 | MT627407 | MT632803 | MT536180 | MT641495 | MT449676 | MT534328 | MT632586 | MT447159 | MT451191 | MT641750 | MT517423 |
| MT350270 | MT370977 | MT506533 | MT520401 | MT627408 | MT632806 | MT536181 | MT641496 | MT449678 | MT534330 | MT632612 | MT447160 | MT451192 | MT641751 | MT517424 |
| MT350271 | MT370978 | MT506534 | MT520404 | MT627409 | MT632807 | MT536182 | MT641497 | MT449679 | MT534332 |          | MT447161 | MT451194 | MT641752 | MT517425 |
| MT350275 | MT370979 | MT506539 | MT520406 | MT627410 | MT632808 | MT536183 | MT641498 | MT460113 | MT534333 |          | MT447162 | MT451195 | MT641754 | MT517426 |
| MT350277 | MT370980 | MT506540 | MT520408 | MT627411 | MT632810 | MT536184 | MT641499 | MT460114 | MT534335 |          | MT447163 | MT451196 | MT641758 | MT517427 |
| MT350282 | MT370981 | MT506541 | MT520409 | MT627412 | MT632811 | MT536185 | MT641500 | MT460116 | MT534337 |          | MT447164 | MT451197 | MT641759 | MT517428 |
| MT358645 | MT370983 | MT506544 | MT520410 | MT627413 | MT632812 | MT536186 | MT641501 | MT460117 | MT578015 |          | MT447165 | MT451198 | MT641760 | MT517429 |
| MT358646 | MT370985 | MT506546 | MT520413 | MT627414 | MT632813 | MT536187 | MT641502 | MT460119 | MT598177 |          | MT447166 | MT451199 | MT641761 | MT517430 |
| MT358647 | MT370986 | MT506649 | MT520414 | MT627415 | MT632814 | MT536188 | MT641503 | MT460120 | MT598178 |          | MT447167 | MT451201 | MT641762 | MT517431 |
| MT358648 | MT370987 | MT506650 | MT520418 | MT627416 | MT632815 | MT536189 | MT641504 | MT460127 | MT620766 |          | MT447168 | MT451202 | MT706050 | MT517432 |
| MT358649 | MT370988 | MT506652 | MT520419 | MT627417 | MT632818 | MT536190 | MT641505 | MT460128 | MT628087 |          | MT447169 | MT451203 |          | MT517433 |
| MT358650 | MT370989 | MT506654 | MT520422 | MT627418 | MT632819 | MT536956 | MT641506 | MT460129 | MT628090 |          | MT447171 | MT451204 |          | MT517434 |
| MT358651 | MT370991 | MT506660 | MT520424 | MT627419 | MT632820 | MT536964 | MT641508 | MT460130 | MT628091 |          | MT447172 | MT451207 |          | MT525950 |
| MT358652 | MT370993 | MT506663 | MT520428 | MT627421 | MT632821 | MT536971 | MT641509 | MT460132 | MT628092 |          | MT447173 | MT451208 |          | MT527178 |
| MT358653 | MT370994 | MT506664 | MT520429 | MT627422 | MT632822 | MT536976 | MT641510 | MT460133 | MT628093 |          | MT447174 | MT451209 |          | MT527184 |
| MT358654 | MT370995 | MT506666 | MT520434 | MT627423 | MT632823 | MT536977 | MT641511 | MT460136 | MT628163 |          | MT447175 | MT451210 |          | MT528237 |
| MT358655 | MT370996 | MT506670 | MT520437 | MT627424 | MT632824 | MT584985 | MT641512 | MT460138 | MT628164 |          | MT447176 | MT451211 |          | MT528239 |
| MT358656 | MT371002 | MT506677 | MT520439 | MT627425 | MT632829 | MT584997 | MT641513 | MT460140 | MT628165 |          | MT447177 | MT451212 |          | MT531537 |
| MT358657 | MT371005 | MT506679 | MT520441 | MT627426 | MT632830 | MT584998 | MT641514 | MT461613 | MT628166 |          | MT451876 | MT451213 |          | MT539726 |
| MT358658 | MT371007 | MT506680 | MT520443 | MT627427 | MT632831 | MT585010 | MT641515 | MT461614 | MT628169 |          | MT451880 | MT451214 |          | MT569470 |
| MT358659 | MT371010 | MT506681 | MT520444 | MT627428 | MT632833 | MT585011 | MT641516 | MT461615 | MT628170 |          | MT451881 | MT451215 |          | MT569471 |
| MT358660 | MT371012 | MT506683 | MT520446 | MT627429 | MT632834 | MT585014 | MT641518 | MT461616 | MT628171 |          | MT451882 | MT451216 |          | MT569472 |
| MT358661 | MT371015 | MT506685 | MT520447 | MT627430 | MT632835 | MT585027 | MT641519 | MT461617 | MT628176 |          | MT451884 | MT451217 |          | MT569473 |
| MT358662 | MT371016 | MT506687 | MT520451 | MT627431 | MT632837 | MT585042 | MT641521 | MT461618 | MT628178 |          | MT451885 | MT451218 |          | MT569474 |
| MT358663 | MT371017 | MT506689 | MT520457 | MT627432 | MT632838 | MT585044 | MT641522 | MT461619 | MT628190 |          | MT451887 | MT451219 |          | MT576025 |
| MT358664 | MT371018 | MT506690 | MT520459 | MT627433 | MT632839 | MT585050 | MT641523 | MT461631 | MT628191 |          | MT451888 | MT451220 |          | MT576026 |
| MT358665 | MT371019 | MT506691 | MT520466 | MT627434 | MT632840 | MT585052 | MT641524 | MT461632 | MT628192 |          | MT451889 | MT451224 |          | MT576027 |
| MT358666 | MT371020 | MT506693 | MT520469 | MT627435 | MT632841 | MT585059 | MT641525 | MT461634 | MT628193 |          | MT451890 | MT451225 |          | MT576028 |
| MT358667 | MT371021 | MT506707 | MT520471 | MT627436 | MT632842 | MT585064 | MT641526 | MT461635 | MT628194 |          | MT457402 | MT451226 |          | MT576029 |
| MT358668 | MT371022 | MT506885 | MT520472 | MT627437 | MT632844 | MT585067 | MT641527 | MT461636 | MT628195 |          | MT457403 | MT451227 |          | MT576030 |
| MT358670 | MT371025 | MT507277 | MT520474 | MT627606 | MT632846 | MT585082 | MT641528 | MT461638 | MT628196 |          | MT467237 | MT451229 |          | MT576645 |

|          |          |          |          |          |          |          |          |          |          |          |          |          |
|----------|----------|----------|----------|----------|----------|----------|----------|----------|----------|----------|----------|----------|
| MT358671 | MT371026 | MT507282 | MT520475 | MT627607 | MT632848 | MT585083 | MT641529 | MT461639 | MT628197 | MT467238 | MT451230 | MT582453 |
| MT358672 | MT371027 | MT509452 | MT520484 | MT627609 | MT632854 | MT585084 | MT641530 | MT461640 | MT628198 | MT467241 | MT451231 | MT582454 |
| MT358675 | MT371029 | MT509453 | MT520485 | MT627612 | MT632855 | MT585085 | MT641532 | MT461641 | MT628199 | MT467243 | MT451232 | MT582456 |
| MT358677 | MT371030 | MT509454 | MT520486 | MT627613 | MT632857 | MT585086 | MT641533 | MT461642 | MT628200 | MT467244 | MT451233 | MT582458 |
| MT358678 | MT371032 | MT509455 | MT520488 | MT627614 | MT632860 | MT585088 | MT641534 | MT461643 | MT628201 | MT467246 | MT451235 | MT582461 |
| MT358679 | MT371033 | MT509456 | MT520490 | MT627615 | MT632861 | MT585089 | MT641535 | MT461644 | MT628202 | MT467247 | MT451236 | MT582462 |
| MT358681 | MT371034 | MT509457 | MT520492 | MT627616 | MT632864 | MT585090 | MT641536 | MT461646 | MT628203 | MT467249 | MT451237 | MT582466 |
| MT358682 | MT371035 | MT509459 | MT520496 | MT627618 | MT632866 | MT585091 | MT641537 | MT461647 | MT628214 | MT467250 | MT451238 | MT582467 |
| MT358683 | MT371036 | MT509460 | MT520498 | MT627619 | MT632867 | MT585092 | MT641538 | MT461648 | MT628215 | MT467251 | MT451239 | MT582468 |
| MT358684 | MT371037 | MT509461 | MT520500 | MT627620 | MT632869 | MT585093 | MT641539 | MT461649 | MT628216 | MT467252 | MT451241 | MT582471 |
| MT358687 | MT371038 | MT509462 | MT520501 | MT627621 | MT632870 | MT585094 | MT641541 | MT461650 | MT628217 | MT467253 | MT451242 | MT582472 |
| MT358688 | MT375430 | MT509463 | MT520502 | MT627623 | MT632871 | MT585095 | MT641542 | MT461651 | MT628273 | MT467254 | MT451244 | MT582473 |
| MT358689 | MT375431 | MT509464 | MT520508 | MT627624 | MT632874 | MT585096 | MT641543 | MT461652 | MT628274 | MT467255 | MT451245 | MT582475 |
| MT358690 | MT375433 | MT509465 | MT520509 | MT627628 | MT632875 | MT585097 | MT641544 | MT461653 | MT628275 | MT467259 | MT451246 | MT582476 |
| MT358691 | MT375437 | MT509467 | MT520512 | MT627629 | MT632877 | MT585098 | MT641545 | MT461654 | MT628276 | MT467263 | MT451247 | MT582481 |
| MT358692 | MT375438 | MT509468 | MT520515 | MT627636 | MT632880 | MT585099 | MT641546 | MT461657 | MT628280 | MT476385 | MT451248 | MT582485 |
| MT358693 | MT375440 | MT509471 | MT520517 | MT627637 | MT632881 | MT585100 | MT641547 | MT461658 | MT631800 | MT477885 | MT451253 | MT582487 |
| MT358694 | MT375441 | MT509472 | MT520520 | MT627638 | MT632883 | MT585101 | MT641548 | MT461660 | MT631802 | MT479223 | MT451255 | MT582491 |
| MT358695 | MT375443 | MT509474 | MT520521 | MT627930 | MT632885 | MT585102 | MT641549 | MT461663 | MT631803 | MT479224 | MT451256 | MT582494 |
| MT358696 | MT375445 | MT509475 | MT520522 | MT627931 | MT632888 | MT585104 | MT641550 | MT461664 | MT631805 | MT479225 | MT451257 | MT582496 |
| MT358697 | MT375446 | MT509477 | MT520523 | MT628124 | MT632889 | MT598175 | MT641552 | MT461666 | MT642080 | MT479226 | MT451258 | MT582498 |
| MT358698 | MT375447 | MT509480 | MT520526 | MT628125 | MT632890 | MT598176 | MT641554 | MT461667 | MT642083 | MT479227 | MT451259 | MT622321 |
| MT358699 | MT375451 | MT509486 | MT520528 | MT628126 | MT632900 | MT620767 | MT641555 | MT461668 | MT642095 | MT481895 | MT451265 | MT635445 |
| MT358700 | MT375452 | MT509488 | MT520533 | MT628127 | MT632901 | MT620769 | MT641556 | MT470219 | MT642096 | MT481896 | MT451269 | MT637143 |
| MT358701 | MT375453 | MT509489 | MT520534 | MT628128 | MT632902 | MT620770 | MT641557 | MT474132 | MT642098 | MT481897 | MT451272 |          |
| MT358702 | MT375454 | MT509490 | MT520535 | MT628129 | MT632903 | MT620771 | MT641558 | MT474133 | MT642099 | MT481898 | MT451274 |          |
| MT358703 | MT375455 | MT509493 | MT520537 | MT628130 | MT632904 | MT620772 | MT641559 | MT474137 | MT642100 | MT481899 | MT451276 |          |
| MT358705 | MT375456 | MT509669 | MT520540 | MT628131 | MT632906 | MT627745 | MT641560 | MT474138 | MT642103 | MT481900 | MT451279 |          |
| MT358706 | MT380728 | MT509674 | MT520541 | MT628132 | MT632907 | MT627746 | MT641561 | MT477846 | MT642106 | MT481901 | MT451281 |          |
| MT358709 | MT380729 | MT509683 | MT520542 | MT628133 | MT632908 | MT627747 | MT641564 | MT477850 | MT642112 | MT481902 | MT451283 |          |
| MT358710 | MT380731 | MT509702 | MT520543 | MT628134 | MT632909 | MT627748 | MT641565 | MT477851 | MT642113 | MT481903 | MT451284 |          |
| MT358711 | MT380732 | MT510718 | MT520544 | MT628135 | MT632912 | MT627749 | MT641567 | MT477855 | MT642114 | MT481905 | MT451286 |          |
| MT358712 | MT380733 | MT510722 | MT520546 | MT628136 | MT632913 | MT627750 | MT641568 | MT477856 | MT642117 | MT481906 | MT451288 |          |
| MT358713 | MT380734 | MT510723 | MT520547 | MT628137 | MT632917 | MT627751 | MT641569 | MT477857 | MT642118 | MT481907 | MT451291 |          |
| MT358714 | MT385414 | MT510725 | MT532557 | MT628138 | MT632918 | MT627752 | MT641570 | MT477858 | MT642119 | MT481909 | MT451295 |          |
| MT358715 | MT385415 | MT510726 | MT533204 | MT628139 | MT632921 | MT627754 | MT641572 | MT477859 | MT642123 | MT483554 | MT451301 |          |
| MT358716 | MT385418 | MT512415 | MT533205 | MT628141 | MT632922 | MT627755 | MT641573 | MT477860 | MT642127 | MT483555 | MT451303 |          |
| MT358717 | MT385420 | MT512416 | MT533206 | MT628142 | MT632924 | MT627756 | MT641575 | MT477861 | MT642128 | MT483557 | MT451309 |          |
| MT358718 | MT385421 | MT512417 | MT533232 | MT628143 | MT632925 | MT627757 | MT641577 | MT477862 | MT642130 | MT483560 | MT451310 |          |

|          |          |          |          |          |          |          |          |          |          |          |          |
|----------|----------|----------|----------|----------|----------|----------|----------|----------|----------|----------|----------|
| MT358721 | MT385422 | MT512420 | MT533233 | MT628145 | MT632926 | MT627758 | MT641578 | MT477903 | MT642131 | MT483702 | MT451311 |
| MT358722 | MT385423 | MT512422 | MT533234 | MT628146 | MT632927 | MT627759 | MT641579 | MT477904 | MT642132 | MT496972 | MT451314 |
| MT358723 | MT385424 | MT512423 | MT535472 | MT628147 | MT632928 | MT627761 | MT641580 | MT481931 | MT642134 | MT496973 | MT451315 |
| MT358724 | MT385425 | MT512424 | MT539162 | MT628148 | MT632929 | MT627763 | MT641581 | MT481932 | MT642139 | MT496974 | MT451317 |
| MT358728 | MT385426 | MT512425 | MT539163 | MT628173 | MT632933 | MT627764 | MT641582 | MT481933 | MT642140 | MT496975 | MT451318 |
| MT358729 | MT385428 | MT512426 | MT598171 | MT628174 | MT632934 | MT627765 | MT641583 | MT481935 | MT642141 | MT496976 | MT451324 |
| MT358730 | MT385429 | MT512427 | MT598173 | MT628175 | MT632938 | MT627766 | MT641584 | MT481936 | MT642145 | MT496980 | MT451328 |
| MT358731 | MT385430 | MT512428 | MT598174 | MT628177 | MT632939 | MT627767 | MT641585 | MT499179 | MT642146 | MT496983 | MT451334 |
| MT358732 | MT385431 | MT512429 | MT598642 | MT628219 | MT632941 | MT627920 | MT641586 | MT499190 | MT642149 | MT496985 | MT451341 |
| MT358733 | MT385432 | MT512430 | MT605816 | MT628220 | MT632942 | MT627921 | MT641587 | MT499198 | MT642155 | MT496986 | MT451347 |
| MT358734 | MT385434 | MT512431 | MT614447 | MT628221 | MT632943 | MT627922 | MT641588 | MT499204 | MT642156 | MT496987 | MT451348 |
| MT358735 | MT385436 | MT512433 | MT614449 | MT628230 | MT632944 | MT627923 | MT641589 | MT499206 | MT642157 | MT496988 | MT451352 |
| MT358736 | MT385437 | MT512434 | MT614450 | MT628231 | MT632945 | MT627924 | MT641590 | MT506565 | MT642162 | MT496989 | MT451353 |
| MT358737 | MT385439 | MT512435 | MT614452 | MT628232 | MT632947 | MT627927 | MT641591 | MT506566 | MT642164 | MT496991 | MT451354 |
| MT358738 | MT385440 | MT512436 | MT614454 | MT628233 | MT632948 | MT627928 | MT641592 | MT506570 | MT642166 | MT496992 | MT451355 |
| MT358739 | MT385441 | MT512437 | MT614457 | MT628234 | MT632949 | MT627929 | MT641593 | MT506572 | MT642167 | MT496993 | MT451356 |
| MT358740 | MT385443 | MT512438 | MT614459 | MT628236 | MT632951 | MT628037 | MT641594 | MT506573 | MT642170 | MT496995 | MT451358 |
| MT358741 | MT385444 | MT512439 | MT614460 | MT628238 | MT632953 | MT628038 | MT641598 | MT506695 | MT642171 | MT496997 | MT451361 |
| MT358742 | MT385445 | MT512440 | MT614461 | MT628243 | MT632954 | MT628039 | MT641599 | MT506696 | MT642173 | MT500122 | MT451364 |
| MT358746 | MT385446 | MT512441 | MT614462 | MT628244 | MT632956 | MT628040 | MT641600 | MT506697 | MT642174 | MT502774 | MT451365 |
| MT358747 | MT385447 | MT512442 | MT614463 | MT628245 | MT632959 | MT628041 | MT641602 | MT506700 | MT642175 | MT509494 | MT451366 |
| MT358748 | MT385448 | MT512443 | MT614464 | MT628246 | MT632963 | MT628043 | MT641603 | MT506886 | MT642176 | MT509495 | MT451367 |
| MT365025 | MT385449 | MT512444 | MT614465 | MT628247 | MT632969 | MT628045 | MT641604 | MT506888 | MT642177 | MT509497 | MT451371 |
| MT365026 | MT385450 | MT512445 | MT614466 | MT628248 | MT632972 | MT628046 | MT641605 | MT506889 | MT642178 | MT509498 | MT451375 |
| MT365027 | MT385453 | MT512446 | MT614467 | MT628249 | MT632973 | MT628047 | MT641606 | MT506890 | MT642180 | MT509499 | MT451378 |
| MT370831 | MT385454 | MT520172 | MT614468 | MT628250 | MT632975 | MT628048 | MT641607 | MT506891 | MT642182 | MT509501 | MT451381 |
| MT370834 | MT385456 | MT520176 | MT614469 | MT628251 | MT632979 | MT628049 | MT641608 | MT506892 | MT642186 | MT509502 | MT451383 |
| MT370835 | MT385457 | MT520177 | MT614470 | MT631808 | MT632982 | MT628050 | MT641610 | MT506893 | MT642191 | MT509503 | MT451386 |
| MT370836 | MT385458 | MT520178 | MT614471 | MT631809 | MT632983 | MT628051 | MT641611 | MT506894 | MT642192 | MT509504 | MT451388 |
| MT370837 | MT385459 | MT520180 | MT614472 | MT632493 | MT632986 | MT628052 | MT641613 | MT506895 | MT642196 | MT509505 | MT451389 |
| MT370838 | MT385460 | MT520182 | MT614474 | MT632495 | MT632988 | MT628053 | MT641617 | MT506897 | MT642200 | MT509506 | MT451390 |
| MT370839 | MT385461 | MT520183 | MT614475 | MT632497 | MT632989 | MT628055 | MT641619 | MT506898 | MT642205 | MT509507 | MT451391 |
| MT370841 | MT385462 | MT520184 | MT614476 | MT632498 | MT632991 | MT628056 | MT641620 | MT506899 | MT642211 | MT509508 | MT451392 |
| MT370842 | MT385463 | MT520185 | MT614477 | MT632499 | MT632992 | MT628057 | MT641621 | MT506901 | MT642213 | MT509509 | MT451398 |
| MT370843 | MT385464 | MT520186 | MT614478 | MT632500 | MT632994 | MT628058 | MT641623 | MT506904 | MT642214 | MT509510 | MT451399 |
| MT370844 | MT385465 | MT520188 | MT614481 | MT632501 | MT632995 | MT628059 | MT641624 | MT506905 | MT642219 | MT509511 | MT451408 |
| MT370846 | MT385466 | MT520189 | MT614482 | MT632502 | MT632997 | MT628061 | MT641625 | MT506906 | MT642222 | MT509649 | MT451410 |
| MT370848 | MT385469 | MT520191 | MT614483 | MT632503 | MT633001 | MT628062 | MT641626 | MT506907 | MT642224 | MT509650 | MT451411 |
| MT370849 | MT385472 | MT520192 | MT614484 | MT632505 | MT633003 | MT628063 | MT641628 | MT507278 | MT642225 | MT509651 | MT451412 |

|          |          |          |          |          |          |          |          |          |          |          |          |
|----------|----------|----------|----------|----------|----------|----------|----------|----------|----------|----------|----------|
| MT370850 | MT385473 | MT520193 | MT614485 | MT632509 | MT633004 | MT628064 | MT641630 | MT507279 | MT642227 | MT509656 | MT451414 |
| MT370851 | MT385474 | MT520194 | MT614486 | MT632510 | MT633005 | MT628065 | MT641631 | MT507280 | MT642231 | MT509657 | MT451415 |
| MT370853 | MT385479 | MT520197 | MT614487 | MT632514 | MT633006 | MT628066 | MT641633 | MT507796 | MT642232 | MT509958 | MT451416 |
| MT370854 | MT385480 | MT520199 | MT614488 | MT632515 | MT633007 | MT628067 | MT641635 | MT512644 | MT642234 | MT510727 | MT451418 |
| MT370856 | MT385481 | MT520200 | MT614489 | MT632518 | MT633019 | MT628068 | MT641639 | MT520174 | MT642238 | MT510728 | MT451419 |
| MT370857 | MT394528 | MT520201 | MT614491 | MT632520 | MT633022 | MT628069 | MT641640 | MT520181 | MT642245 | MT517436 | MT451423 |
| MT370858 | MT394529 | MT520203 | MT614496 | MT632521 | MT633025 | MT628070 | MT641642 | MT520187 | MT642246 | MT517437 | MT451425 |
| MT370859 | MT394530 | MT520204 | MT614497 | MT632522 | MT633044 | MT628073 | MT641643 | MT520195 | MT642248 | MT534630 | MT451426 |
| MT370861 | MT394531 | MT520209 | MT614498 | MT632523 | MT646053 | MT628074 | MT642068 | MT520196 | MT642250 | MT539158 | MT451427 |
| MT370862 | MT412173 | MT520212 | MT614499 | MT632525 | MT646054 | MT628075 | MT642073 | MT520198 | MT642251 | MT539159 | MT451429 |
| MT370863 | MT412176 | MT520215 | MT614500 | MT632526 | MT646064 | MT628076 | MT642074 | MT520207 | MT642259 | MT539160 | MT451430 |
| MT370864 | MT412178 | MT520217 | MT614501 | MT632527 | MT646065 | MT628077 | MT642078 | MT520210 | MT642260 | MT539166 | MT451432 |
| MT370866 | MT412233 | MT520218 | MT614503 | MT632531 | MT646068 | MT628078 | MT642081 | MT520214 | MT642267 | MT539167 | MT451433 |
| MT370868 | MT412234 | MT520220 | MT614504 | MT632534 | MT646069 | MT628079 | MT642085 | MT520216 | MT642273 | MT539169 | MT451434 |
| MT370869 | MT412235 | MT520221 | MT614507 | MT632535 | MT646070 | MT628080 | MT642086 | MT520219 | MT642276 | MT539170 | MT451435 |
| MT370871 | MT412236 | MT520224 | MT614508 | MT632538 | MT646071 | MT628081 | MT642087 | MT520222 | MT642279 | MT539171 | MT451438 |
| MT370872 | MT412237 | MT520225 | MT614509 | MT632539 | MT646072 | MT628082 | MT642089 | MT520223 | MT642281 | MT539172 | MT451439 |
| MT370874 | MT412238 | MT520231 | MT614510 | MT632540 | MT646073 | MT628084 | MT642092 | MT520228 | MT642282 | MT539173 | MT451440 |
| MT370876 | MT412240 | MT520236 | MT614513 | MT632541 | MT646074 | MT628085 | MT642093 | MT520230 | MT642289 | MT539174 | MT451441 |
| MT370880 | MT412242 | MT520238 | MT614514 | MT632543 | MT646075 | MT628095 | MT642102 | MT520232 | MT642291 | MT539175 | MT451442 |
| MT370881 | MT412244 | MT520245 | MT614516 | MT632544 | MT646076 | MT628097 | MT642104 | MT520234 | MT642292 | MT539176 | MT451446 |
| MT370882 | MT412245 | MT520249 | MT614520 | MT632546 | MT646077 | MT628098 | MT642105 | MT520235 | MT642294 | MT560525 | MT451447 |
| MT370883 | MT412246 | MT520250 | MT614522 | MT632547 | MT646078 | MT628100 | MT642107 | MT520237 | MT642296 | MT560530 | MT451448 |
| MT370885 | MT412247 | MT520253 | MT614523 | MT632548 | MT646079 | MT628101 | MT642109 | MT520239 | MT642297 | MT560531 | MT451449 |
| MT370886 | MT412248 | MT520255 | MT614524 | MT632549 | MT646080 | MT628105 | MT642111 | MT520240 | MT642301 | MT560656 | MT451452 |
| MT370888 | MT412249 | MT520257 | MT614525 | MT632550 | MT646081 | MT628110 | MT642115 | MT520243 | MT642304 | MT560657 | MT451456 |
| MT370889 | MT412250 | MT520258 | MT614526 | MT632551 | MT646082 | MT628113 | MT642116 | MT520244 | MT642306 | MT560667 | MT451457 |



A.

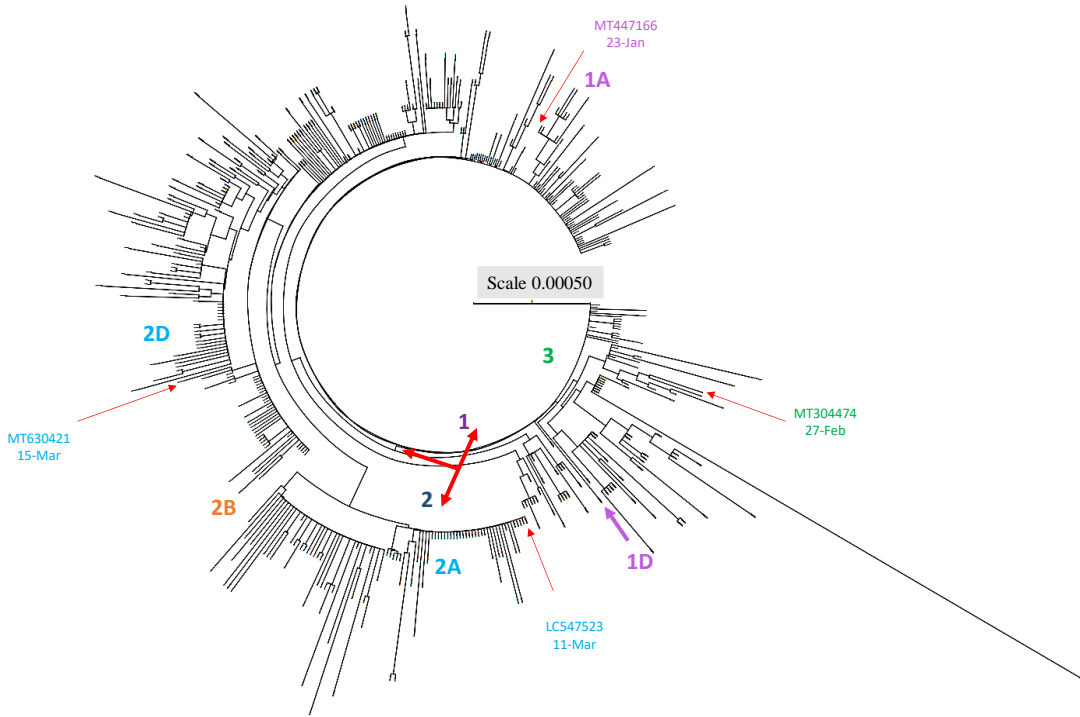

B.

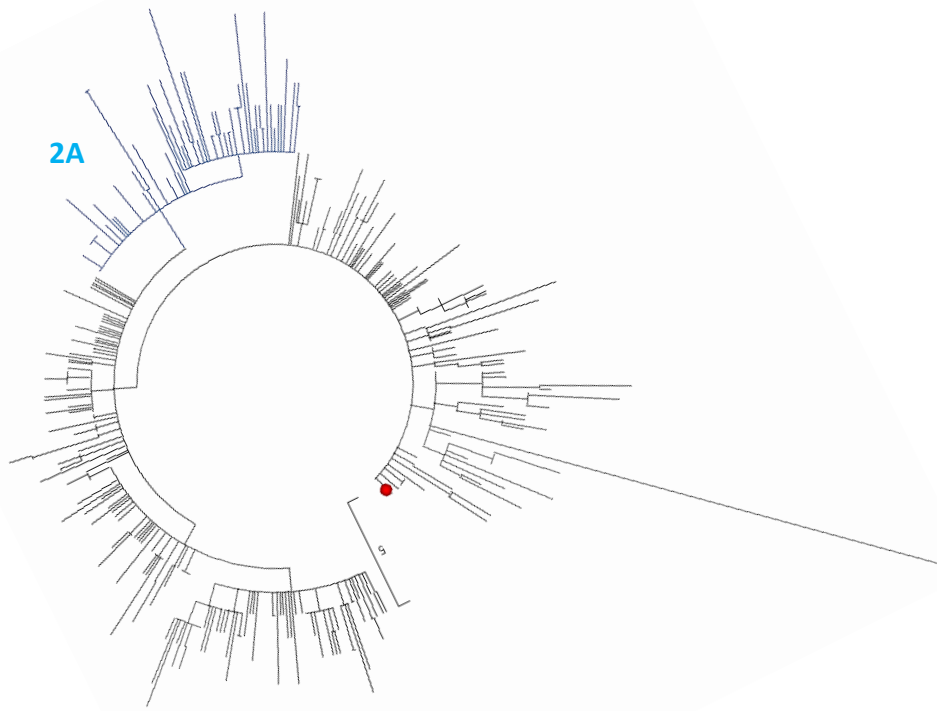

**Supplemental Figure 1.** Phylogenetic tree of 440 SARS-CoV-2 genome sequences from Asia variants. Phylogeny of SARS-CoV-2 lineages in Asia construct with Maximum Composite Likelihood distance by Neighbor-Joining tree from MEGA CC (A). The evolutionary history was inferred using the Maximum Parsimony method for analysis (B). The first strain by date and country from each clade and subclade was collected that showed in the same color with each group in Figure 2A. Sub-haplogroup 2A containing 83 Asia strains was marked in light blue that conserved with the same topology in phylogeny construct by Neighbor-Joining in Supplemental Figure 1A.

A.

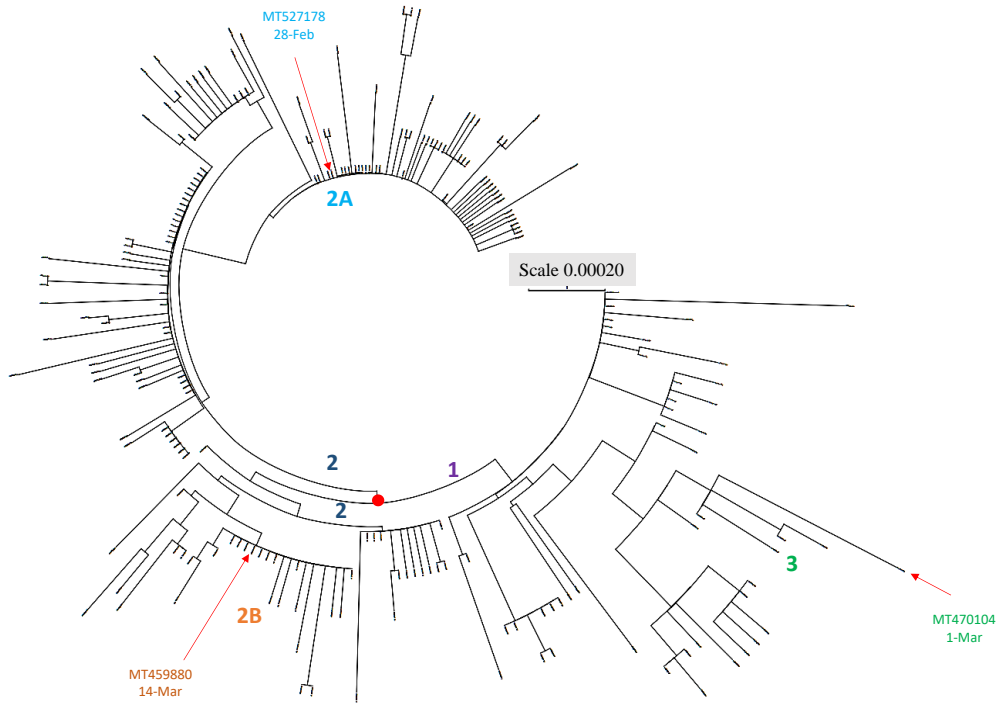

B.

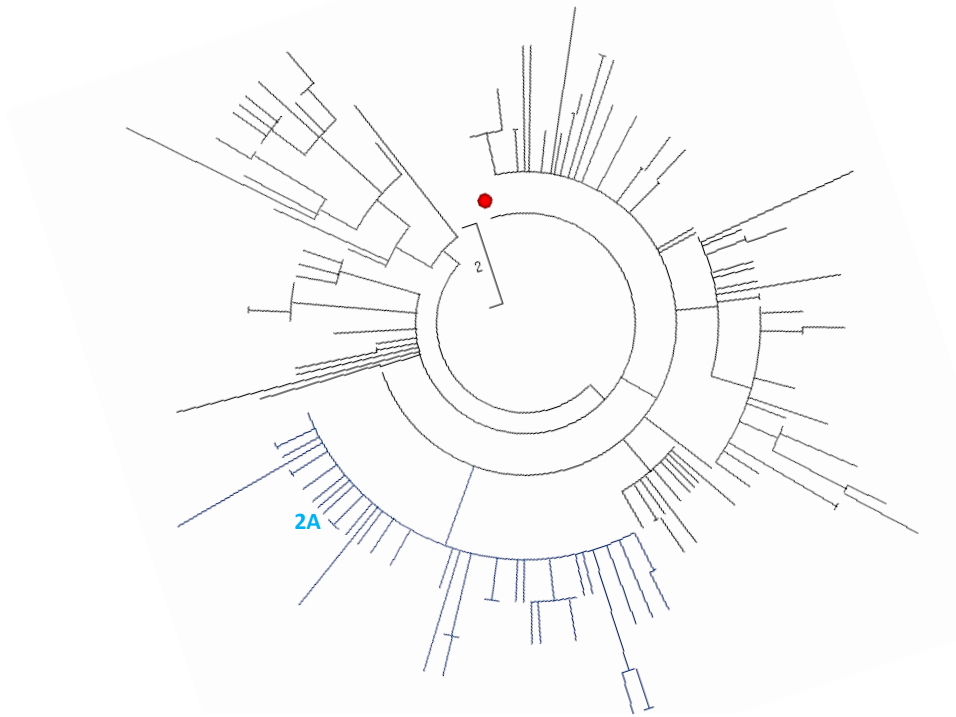

**Supplemental Figure 2.** Phylogenetic tree of 212 SARS-CoV-2 genome sequences from Europe variants. Phylogeny of SARS-CoV-2 lineages in Europe construct with Maximum Composite Likelihood distance by Neighbor-Joining tree from MEGA CC (A). The evolutionary history was inferred using the Maximum Parsimony method for analysis (B). The first strain by date and country from each Clade and Subclade was collected that showed in the same color with each group in Figure 2A. Sub-haplogroup 2A containing 63 SARS-CoV-2 variants collected in Europe was marked in light blue to compare with the topology in Neighbor-Joining data in Supplemental Figure 2A.

A.

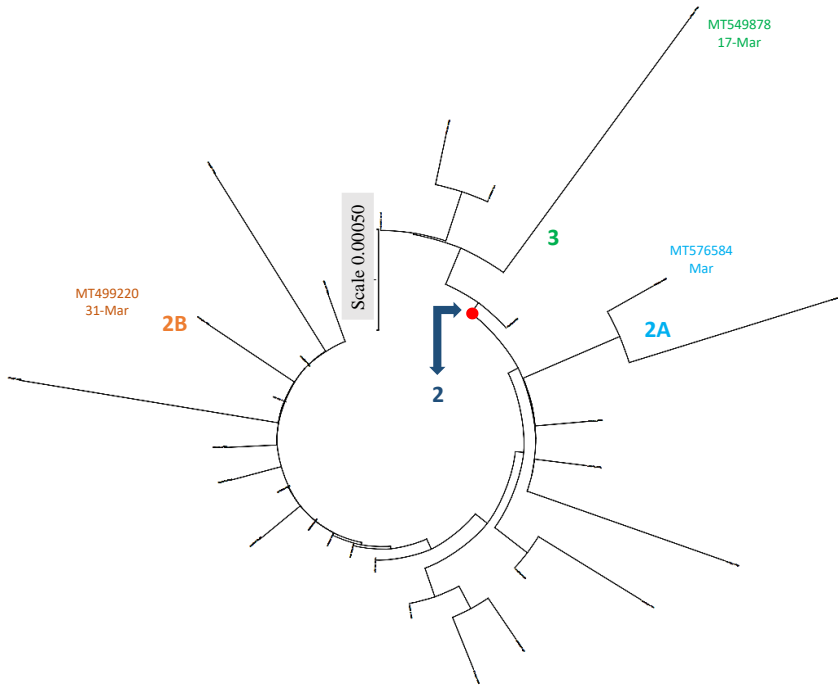

B.

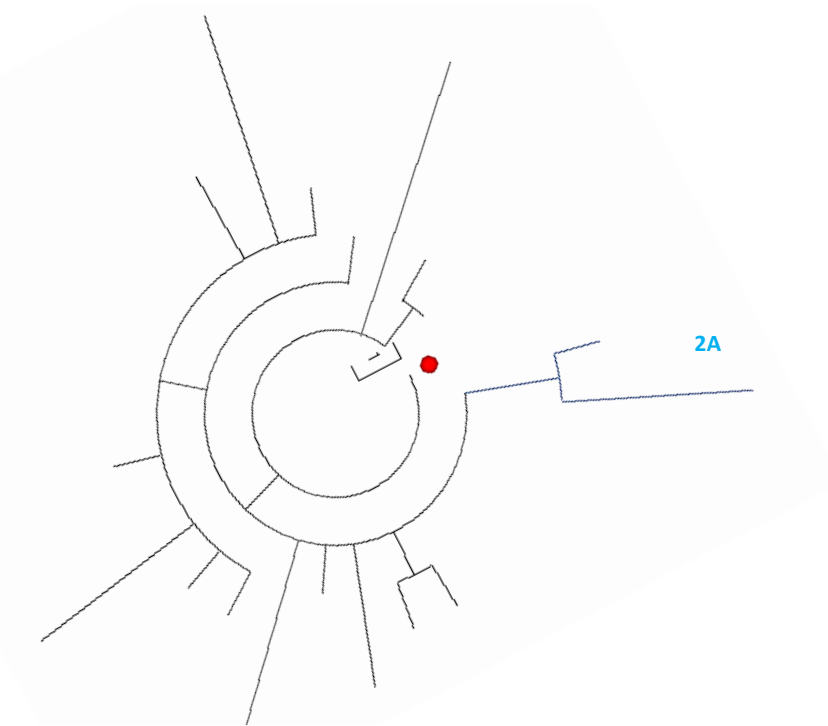

**Supplemental Figure 3.** Phylogenetic tree of 29 SARS-CoV-2 genome sequences from Africa variants. Phylogeny of SARS-CoV-2 lineages in Africa construct with Maximum Composite Likelihood distance by Neighbor-Joining tree from MEGA CC (A). The evolutionary history was inferred using the Maximum Parsimony method for analysis (B). The first strain by date and country from each clade and subclade was collected that showed in the same color with each group in Figure 2A. The subclade 2A was separated in a branch, as marked in light blue color.
